# Supplementary material
Source: PubMed Central journal article supplement (PMC2929755)

### Histogram of BMI

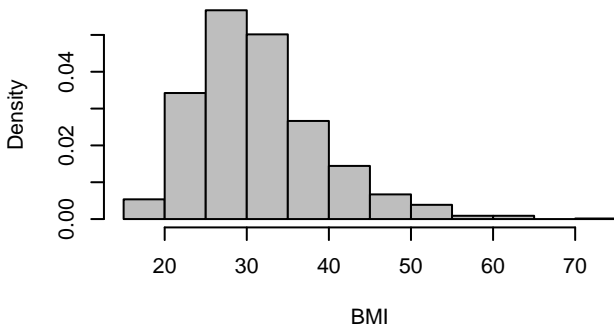

### Normal Q-Q Plot

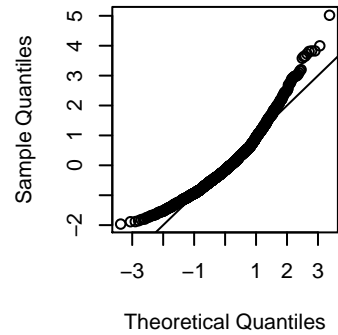

### Histogram of Log(BMI)

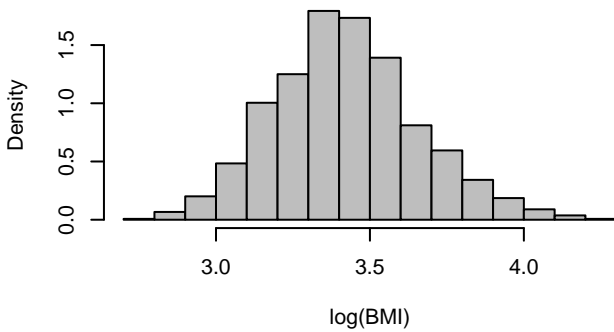

### Normal Q-Q Plot

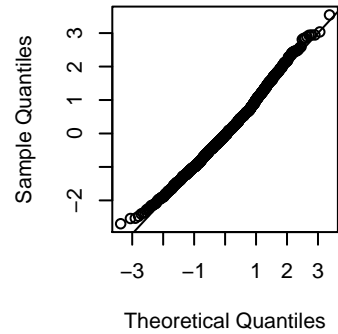

### Histogram of Log(Log(BMI))

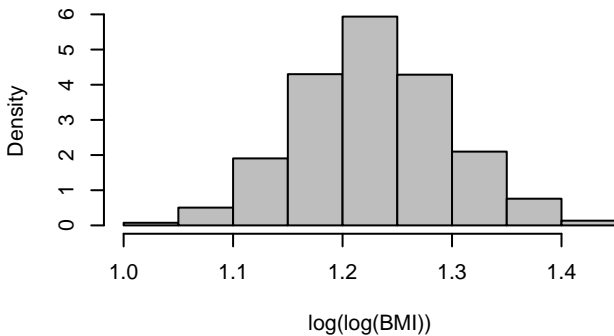

### Normal Q-Q Plot

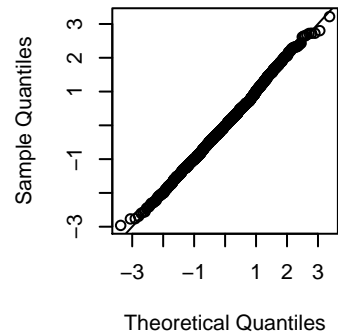

Supplement: NIHMS214036-supplement-Figure_S1.pdf [file NIHMS214036-supplement-Figure_S1.pdf]
