# Supplementary material
Source: PubMed Central journal article supplement (PMC2929755)

**Scatter Plot of Excess European Ancestry at D3S1311 and LogLog(BMI)**

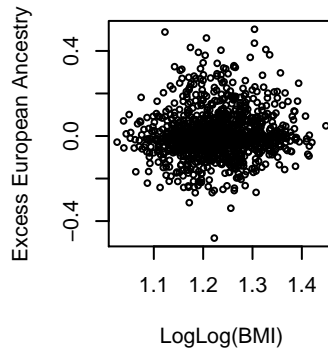

**Scatter Plot of Excess European Ancestry at D15S652 and LogLog(BMI)**

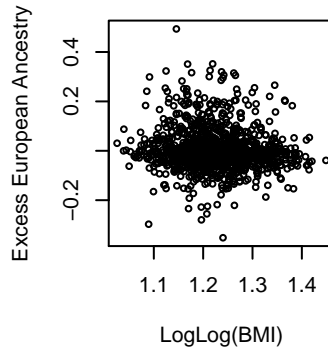

**Scatter Plot of Excess European Ancestry at D15S816 and LogLog(BMI)**

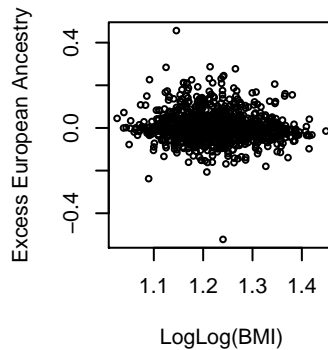

Supplement: NIHMS214036-supplement-Figure_S2.pdf [file NIHMS214036-supplement-Figure_S2.pdf]
